# Supplementary material for: Human Milk Antibodies against S1 and S2 Subunits from SARS-CoV-2, HCoV-OC43, and HCoV-229E in Mothers with a Confirmed COVID-19 PCR, Viral SYMPTOMS, and Unexposed Mothers
Source: Int J Mol Sci. 2021 Feb 9;22(4):1749. doi: 10.3390/ijms22041749 (PMC7916441; doi:10.3390/ijms22041749)
Supplement: Supplementary file 1 [file ijms-22-01749-s001.pdf]

**Table S1.** Participant characteristics<sup>1</sup> with a confirmed COVID-19 PCR test (M1 to M7). The control group (C1 to C6) represents unexposed mothers who donated human milk samples before the COVID-19 pandemic in 2018.

| Mothers | Confirmed COVID-19 PCR<br>(Nasal Swab) | COVID-19 Symptoms                             | Time from<br>Infection to<br>Collection (Days) | Infant<br>Gender | Lactation Time<br>(Months) | Maternal Age |
|---------|----------------------------------------|-----------------------------------------------|------------------------------------------------|------------------|----------------------------|--------------|
| M1      | +COVID19 PCR                           | Fever, fatigue, cough                         | 61                                             | Female           | 5                          | 36           |
| M2      | +COVID-19 PCR                          | Cough, fatigue, fever, loss of<br>taste/smell | 60                                             | Female           | 6                          | 26           |
| M3      | +RNA SARS-CoV-2 PCR                    | Fever, nasal congestion, and<br>cough         | 84                                             | Female           | 6                          | 26           |
| M4      | +COVID-19 PCR                          | Fatigue, fever                                | 40                                             | Male             | 6                          | 33           |
| M5      | +COVID-19 PCR                          | Fever and cough                               | 16                                             | Male             | 8                          | 37           |
| M6      | +RNA SARS-CoV-2 PCR                    | Cough and fever                               | 47                                             | Male             | 8                          | 31           |
| M7      | +COVID-19-PCR                          | Headaches, fatigue, fever                     | 18                                             | Male             | 5                          | 33           |
| C1      | -                                      | Unknown                                       | -                                              | Male             | 8                          | 28           |
| C2      | -                                      | Unknown                                       | -                                              | Female           | 5                          | 37           |
| C3      | -                                      | Unknown                                       | -                                              | Male             | 7                          | 29           |
| C4      | -                                      | Unknown                                       | -                                              | Female           | 5                          | 35           |
| C5      | -                                      | Unknown                                       | -                                              | Male             | 5                          | 33           |
| C6      | -                                      | Unknown                                       | -                                              | Female           | 7                          | 27           |

Women did not have a medical history, medication and systematic diseases.

**A S1 subunit SARS-CoV-2**

P0DTC213-685 (YP\_009724390.1)

SQCYNLTTRTQLPPAYTNSFTRGVYYPDKVFRSSVLHSTQDLFLPFFSNVTWFAHIVSG  
TNGTKRFDNPLPFDNDGVYFASTEKSNIRGWIFGTTLDSTQSLIVNATNVVIVKCE  
FQFCNDPFLGVYVYHKNKSWMESEFRVYSSANNCFTFEYVQPFMLDLEGKQGNFKNREF  
VFNKIDGYFKIYKHTPINLVRDLPGQFSALEPLVDLPIGINITRFQTLALHRSYLTGP  
DSSSGWTAGAAAYVGYLQPTFTLLKYNENGTITDAVDCALDPLSETCKTLKSTVEKGI  
YQTSNFRVQPTESIVRFNPNITLCPFGEVFNATRFASVYAWNRKRISNCVADYSVLNYS  
SFSTFKCYGVSTKLNLDLCTNVYADSFVIRGDEVQIAPGQTGKIADYNYKLPDDFTGC  
VIAWNSNLDLSDKVGNNYLYRLFRKSNLKPFERDSTEIYQAGSTPCNGVEGFNCYFPL  
QSYGFPQPTNGVGYQPYRVVLSFELHAPATVCGPKKSTNLVKNKCVNFMNGLTGTGVL  
TESNKKFLPFQGFGRDIADTTDAVRDPTLELDITPCSFGGVSVITPGTNTSNQAVLY  
QDVNCTEVPVAIHADQLTPTRVYSTGNSVFGTRAGCLIGAEHVNNSEYCDIPAGIGICA  
SYQTQTNSPRRAR

**C S1+S2 HCoV-229E**

A0A1L7B942 (APT69883.1)

MFLVLLVAYALLHIAGCQTNGTNTSHSVNCGVGHSENVFAVESGGYIPSNFSFNNWFL  
TNTSSVVDGVVRSFQPLLNLCLVSVSGSOFTTGFVYFNGTGRGACKGFYSNASSDVIRYN  
INFEENLRRTGILFKTSYGAVVFCYNTNLTVSGDAHIPSGTVLGNFCVNTTIGNETTS  
AFVGFALPKTVREFVISRTGHFYNGYRYSFLGDVEAVNFVNATIVCTVALASADVL  
NVQSOTAIANIYCNVIRNLRCDDLSFDVDPDGFYSTSIQPIQVPELPMISVSLPVYHKHTF  
ILVHKVEHQRGPGKCYNCRPSVINITLANFNETKGPLCVDTSHTTQFDVNVKLARWSA  
SINTGNCPSFGKVNPFVGSVCSFLKDIPGGCAMPIMANLVNHKSHNIGSLYVSDG  
DVTGVPKPEGVSSFMNVTLNKCTKYNIYDVSGVGVIRISNDTFLNGITYTSTSGNLLG  
FKDVTNGTITSITPCNPPDLVYVQQAQVVGAMLSNFSTSYGFSNVNEMPKFFYASNGTYN  
CTDAVLTYSSFGVGCADGSIAVQPRNVSYDSVAIVTANLSIPSNWTTSVQVEYLQITSK  
PIVVDCTSYVCGNVRVCELLKQYTSACKTIEDALRNSAMLESADVSEMLTDFDKAFTLA  
NVSSFGDYNLSVIPSILPRSGSRVAGRSIEDILFSLVTSGLGTVADYKCKTKGLSIA  
DLACAQYNGIMVLPVGADEARMAMYTGLIGGIALGGLTSAASIPFSLAIQSRNLVYAL  
QTDVLEQNKILAAASFNAKMTNIVDAFTGVNDAITQTSQALQTVATALNKIQDVVNOQGN  
SLNHLTSQLRQNFQAISSSIQAIYDRLDIIQADQVDRITGLRALNVFVSHLTLYTE  
VRASRQLAQKQVNECVKSSQSKRYGFCGNGTHIFSLVNAEPEGLVFLHTVLLPTQYKDVEA  
WSGLCVDGNGYVLRQPNLALYKEGNYRITSRIMFEPRIPTIADFVQIENCNVTFNVIS  
RSELQTVIPEYIDVNTLQELSYKLPNYTVPDLVVEQYNTQILNLTSEISTLENKSAELN  
YTVQKLQTLIDINNSTLVDLKWLNREYTIKWPWWVWLCISVVLIVVSMILLCCCSTGC  
CGFFSCFASSIKGCCSTKLPHYVDEKIHQ

**B S2 subunit SARS-CoV-2**

P0DTC21686-1273 (YP\_009724390.1)

SVASQSIAYTMSLGAENSVAYSNNSIAIPTNFTISVTTEILPVSMTKTSVDCTMYICGD  
STECNSNLLQYGSFCTQLNRALTGIAVEQDKNTQEVFAQVKIYKTPPIKDFGGFNFSQI  
LPDPSKPSKRSFIEDLLFNKVTADAGFIKQYDGLCDIAARDLCAQKFNGLTVLPPL  
TDEMIAQYTSALLAGTITSGWTFGAGAAQIPFAMQMAYRFNGIGVTONVLYENQKLIAN  
QFNSAIGKIQDLSSTASALGKLDQVNVQNAQALNTLVKQLSSNFGAISVLDNLSRLD  
KVEAEVQIDRLITGRQLQTYVTOQLIRAAEIRASANLAATKMSCEVLGQSKRVDFCGK  
GYHLSMFQSPHGVFLVHTVYPAQEKNTFTAPACHDGAHFFREGVFSNGTHWFTV  
QRNFYEPQIITDNTFVSGNCDVIGIVNNTVYDPLQPELDSFKEELDQYKFNHSTHWFV  
LGDISGINASVNNIOEIDRLNEVAKNLNLSLIDQLQELGYEYQIKWPWYIWLGFIAGLI  
AIVMTIMLCCMTSCCCKGCGCCGCKFDEDDSEPVKGVKLYH

**D S1+S2 HCoV-OC43**

A0A2P1ZWW8 (AVR40344.1)

MFLILLISLPTAFVIGDLNCTLDPRLKSGFNNRDTGPPSISIDTVDVNTGLGTYVYVLD  
VYLNNTTLFNGYPTSGSTYRNMALKGTDLLSTLWFKPPFLSDFINGIFAKVKNKVKFD  
GVMYSEFPATIGSTFVNTSYSVVQVPTINSTODGVNKLQGLLEVSVCQYNMCEYPHTI  
CHPNLGNHFKELWHYDTGVVSCLYKRNFTYDVNATLYLHFYQEGGTFFAYFTDTGFVTK  
FLFNVLGMALSHYVMPVLTGIRPKDGFSLYVWVTLPTQRYLLAFNQDGIIFNAVDCM  
SDFMSEIKCKTQSIAPPTGVYELNGYTVQVPAADVYRRKPDLPNCINEAWLNDKSVSPPLN  
WERKTFNSCNFMNSSLMSFIQADSFCTCNDAAKIYGMCFSSITIDKFAIPNRKVDQL  
GNLGLVQSSNIRIDTATSCQLYNNLPAANVSVSRFPSTWNKRFGEFSDVFPQPTGV  
FTNHSVYVYQHCFAKPKNFCPCSSCPCGKNGIGTCAPTGNSLTCNLDLTPITLKAP  
DTYKCPQSKSLVIGIEHCSGLAVKSDYCGNNSCTCQQAFLGWSADSCQGDKNCFANF  
ILHDVNNGLTCTDLQKANTEIELGVCVNYDLYGISGGGIFVEVNTATYNSWNLVYD  
GNLYGFRDYITNRTFMHSCYSGRVSAAYHANSEPALFRNICKNYVFNNSLTQLQPI  
NYSFDSYLCGVNAYNSTAISVQTCDLTVGSGYCVDYSKNRRSRAITTYRFTNFPEFT  
VNSVNDSELPVGGLEYIQIPSEFTIGNMEEFIQTSSPKVITDCAAFVCGDYAACKLQVE  
YGSFCDNINAILTEVNEILLDTTQLQVANSLMNGVTLSTKLKDVGNVFNDDINFSPLVGL  
GSECKSASSRSIEDLLFDKVKLSDVGVFEAYNNCTGGAEIRDLCVQSYGKIVLPPL  
SENQISGYTLAATSASLFPWPTAAAGVPFYLNVQYRINGLVMTDVLQNGKLIANAFNN  
ALHAIQGGFDATNSALVKIQAIVNANAEALNLLQQLSNRFGAISASLQELSRDLDAEA  
EAQIDRLINGRLTALNAYVSQLSDSTLVKFSAAQAMEKVNCEVKQSQRNFCNGNHN  
ISLVQNPAPYGLYFIHFNYPTKYVTAQVSPGLCIAGNRGIAPKSGYFVNNTNWMYTGSG  
YYYPEPITENNVMVMTCAVNYTKAPYVMLNTIPNPDFKEELDQWFKNQTSVAPDL  
DYINVTFLDQVEMNRLQEAIVLNHSYINLKDITGYEYVVKWPWYVWLLICLAGVAMLV  
LLFFICCTCGGTSCFKKCGGCCDDYTGQELVKTSHDD

**Figure S1.** Amino acid sequences from (A) S1 subunit and (B) S2 subunit from SARS-CoV-2, S1 + S2 subunits from (C) HCoV-229E and (D) HCoV-OC43. Sequences were from UniProt (ELIXIR core data resource).

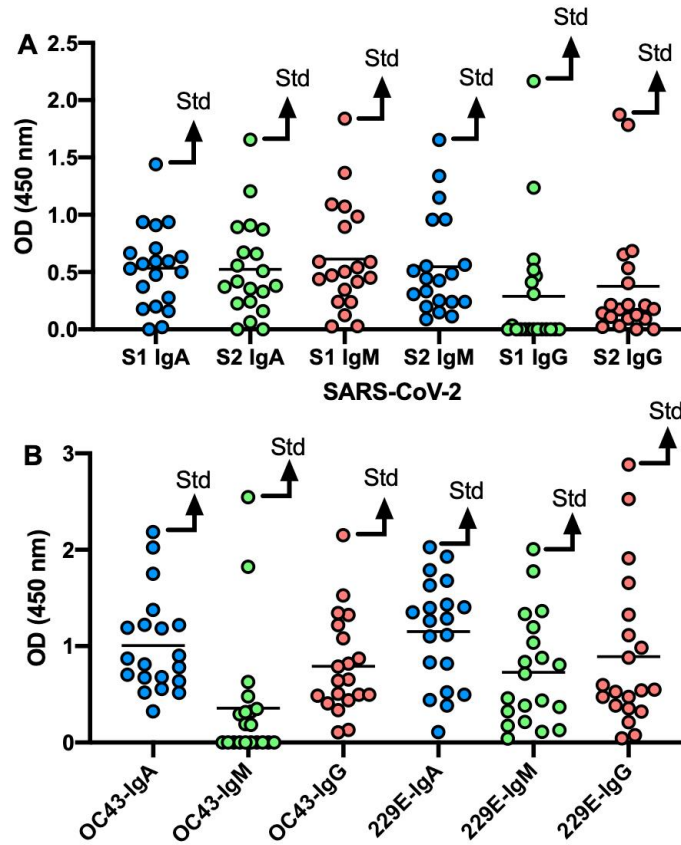

**Figure S2.** Selection of standards (std) with the highest optical density (OD) values using ELISA. The OD values for antibody secretory IgA (SIgA)/IgA, secretory IgM (SIgM)/IgM, and IgG reactive to (A) S1 or S2 subunit SARS-CoV-2, (B) S1+S2 subunits HCoV-OC43, or S1+S2 subunits HCoV-229E. The standards were selected among 20 human milk samples (supernatants) diluted at 10x for IgG and IgM and at 25x for SIgA/IgA in blocking buffer.

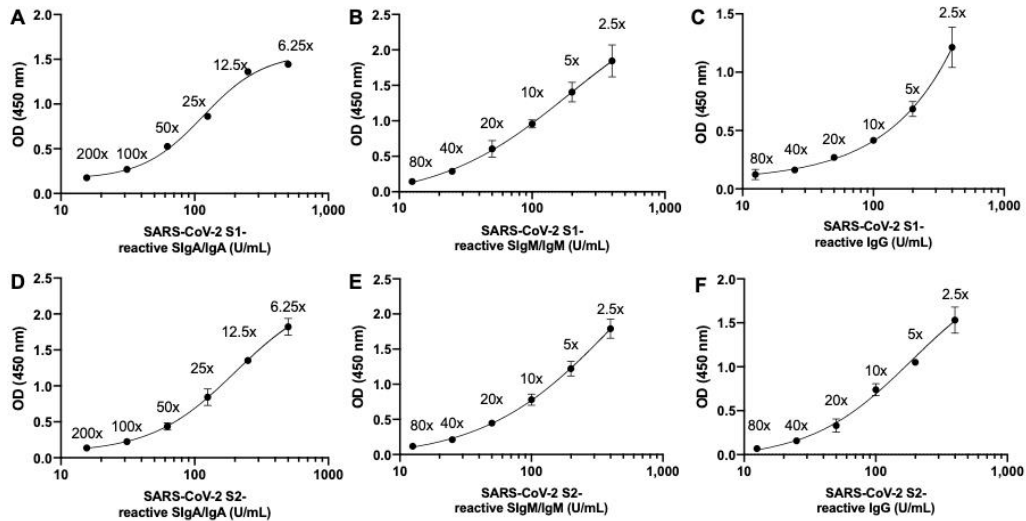

**Figure S3.** Standard curves used to determine the levels of antibodies reactive to SARS-CoV-2 S1 or S2 subunit. Standard curves for SARS-CoV-2 S1-reactive **a** secretory IgA (SIgA)/IgA, **b** secretory IgM (SIgM)/IgM, and **c** IgG. Standard curves for SARS-CoV-2 S2-reactive **d** SIgM/IgM, **e** SIgA/IgA, and **f** IgG. Values are means  $\pm$  SD,  $n = 3$  for experiments. The standard curves were prepared using the human milk supernatant with the highest optical density values (see Figure S2).

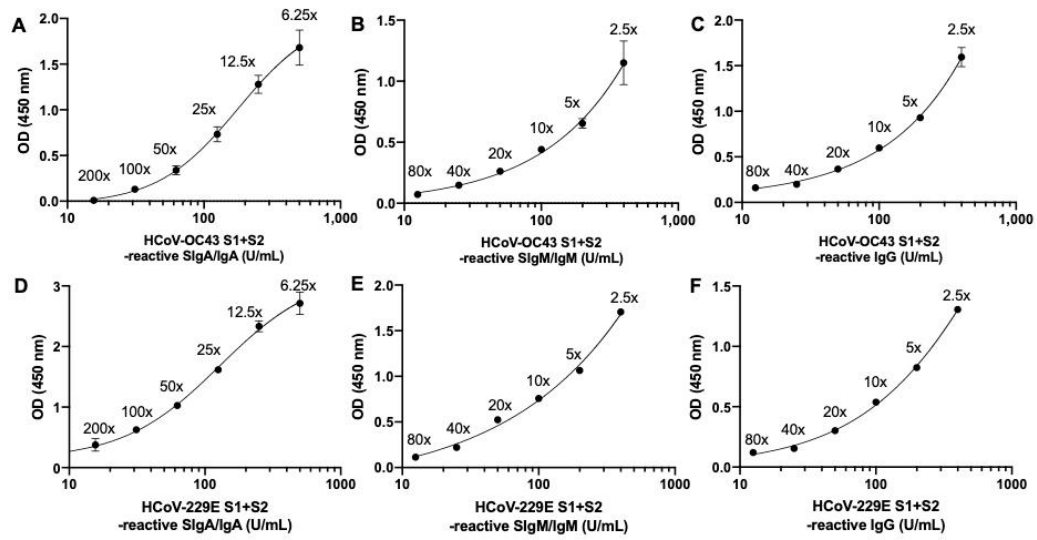

**Figure S4.** Standard curves used to determine the levels of antibodies reactive to HCoV-OC43 and HCoV-229E S1+S2 subunits. Standard curves for HCoV-OC43 S1+S2-reactive **a** secretory IgA (SIgA)/IgA, **b** secretory IgM (SIgM)/IgM, and **c** IgG. Values are means  $\pm$  SD,  $n = 3$  for experiments. The standards were prepared using the human milk supernatant with the highest optical density values (see Figure S2).
